# Supplementary material
Source: MDPI journal article supplement (https://www.mdpi.com/2079-9284/2/2/66)
Supplement: s2 [file s2]

## **Supplementary File 2**

### **Gels for Soothing and Protection Study**

Water, carbomer, sodium citrate, sodium hydroxide, preservatives. Active contained 0.3% w/v *Fucus vesiculosus* or *Undaria pinnatifida* extract.

### **Cream for Brightness, Age Spots and Wrinkles Study**

Water, Glycerin, Xanthan Gum, PEG-8 Stearate, Cetearyl Ethylhexanoate, Glyceryl Stearate, Stearyl Heptanoate, Cetyl Alcohol, Butyl Stearate, Olive Glycerides, Stearyl Caprylate, Cetyl Palmitate, Sorbitan Sesquioleate, Stearic Acid, Tocopherol, Potassium Hydroxide, Dimethicone, Methylchloroisothiazolinone, Methylisothiazolinone, Magnesium Nitrate, Magnesium Chloride. The active cream also contained 0.3% w/v *Fucus vesiculosus* extract.
